# Supplementary material for: A new mode of mitochondrial transport and polarized sorting regulated by Dynein, Milton and Miro
Source: Oxford University Press journal article supplement (doi:10.1242/dev.138289), 2016-10-06
Supplement: dev138289supp.pdf [file dev138289supp.pdf]

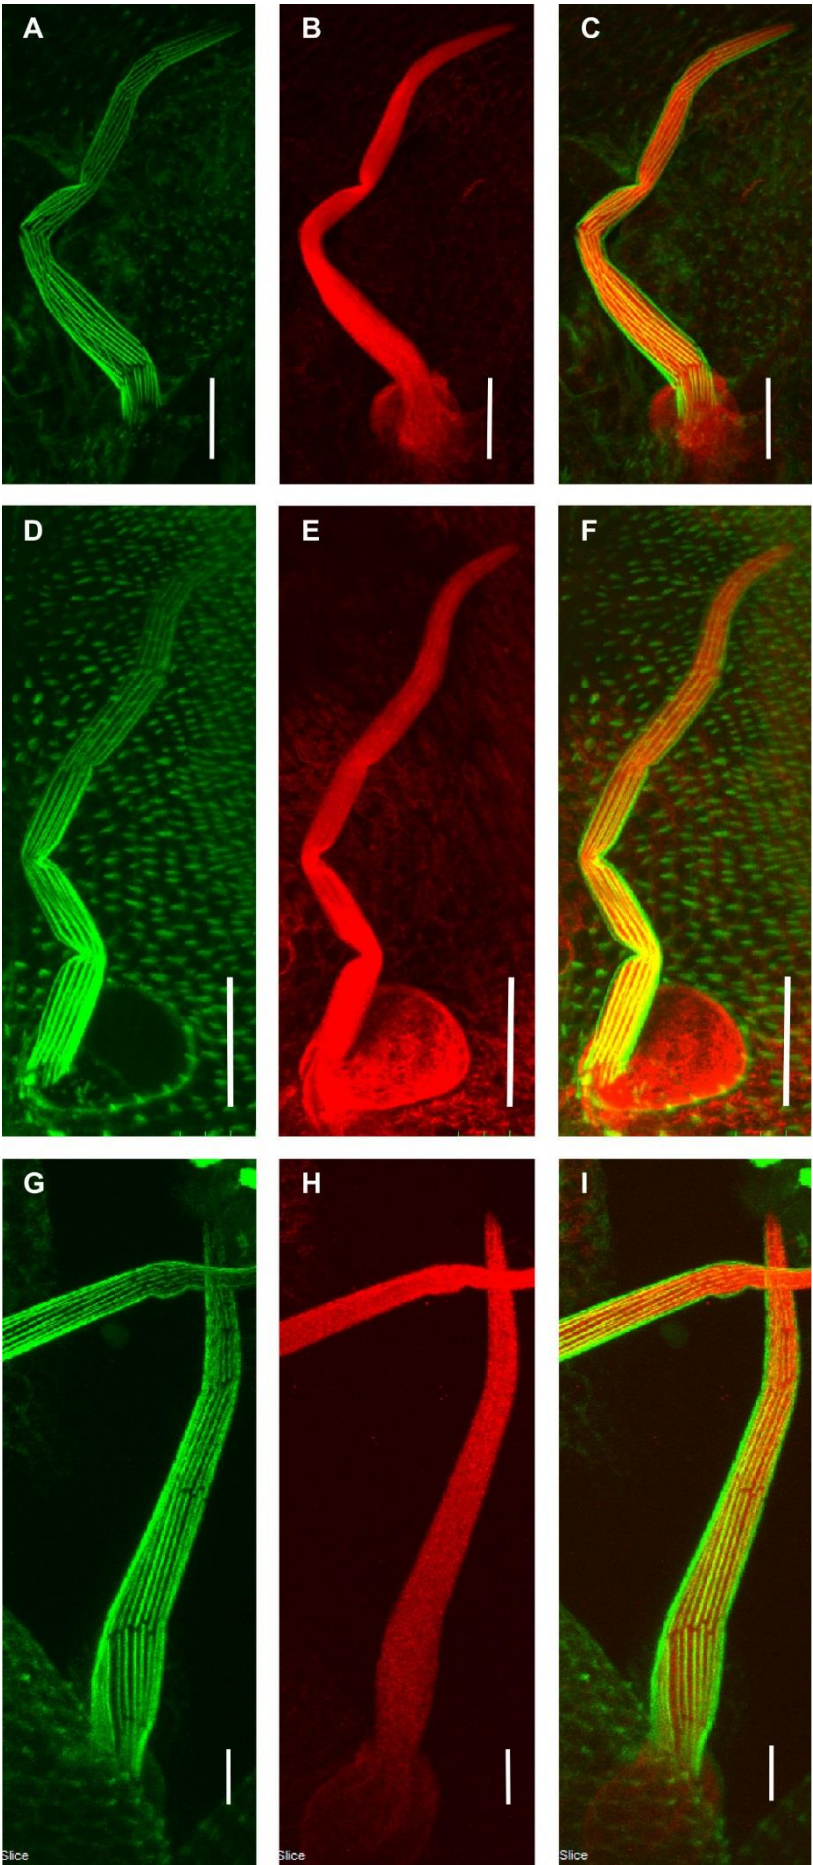

**Supplemental Figure 1. *Glued* and *Miro* mutants show no defects in actin and stable microtubule organization.**

Confocal projections of bristles from wild type, scale bar 20  $\mu\text{m}$  (A-C), *neur-Gal4-UAS-p150-delta96B*<sup>51645</sup>, scale bar 20  $\mu\text{m}$  (D-F) and *neur-Gal4-UAS-Miro-RNAi*<sup>106683</sup>, scale bar 10  $\mu\text{m}$  (G-I) pupae stained with Oregon green-phalloidin (green) and with anti-acetylated-tubulin antibodies (red). No obvious defects in stable microtubule localization pattern were detected in both mutants.

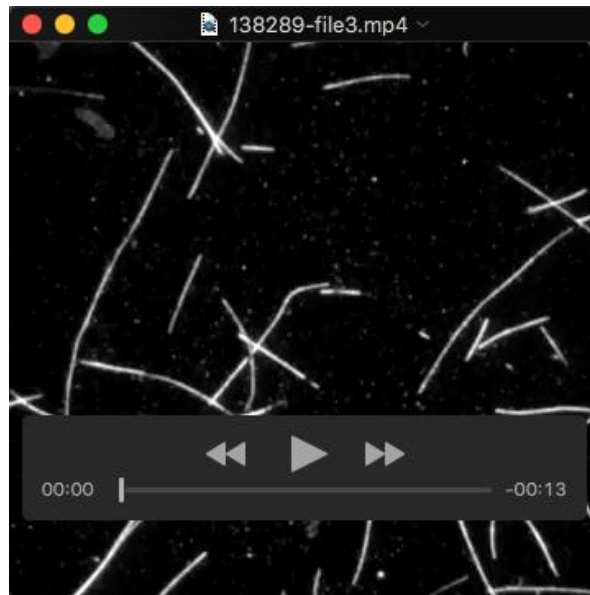

**Supplemental Movie 1 - Microtubule gliding assay with wild type (DYNC1H1) immobilised recombinant human dynein.**

Representative time-lapse movie of gliding of 543-labelled microtubules by surface-immobilised GFP-dynein with GFP antibodies (GFP channel not shown).

This assay was performed in 30 mM HEPES, 5 mM MgSO<sub>4</sub>, 1 mM DTT, 1 mM EGTA, 40  $\mu$ M taxol, 1 mg/ml  $\alpha$ -casein, 2.5mM ATP, pH 7.0).

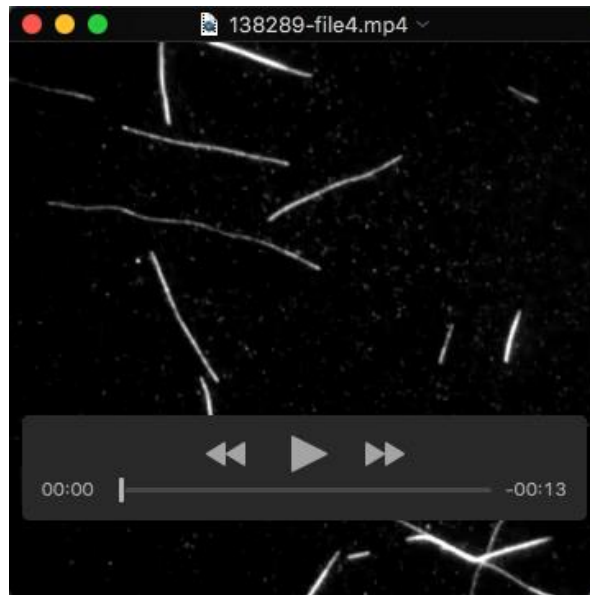

**Supplemental Movie 2 - Microtubule gliding assay with mutant (DYNC1H1<sup>D/V</sup>) immobilised recombinant human dynein.**

Representative time-lapse movie of gliding of 543-labelled microtubules by surface-immobilised GFP-dynein with GFP antibodies (GFP channel not shown).

This assay was performed in 30 mM HEPES, 5 mM MgSO<sub>4</sub>, 1 mM DTT, 1 mM EGTA, 40  $\mu$ M taxol, 1 mg/ml  $\alpha$ -casein, 2.5mM ATP, pH 7.0).

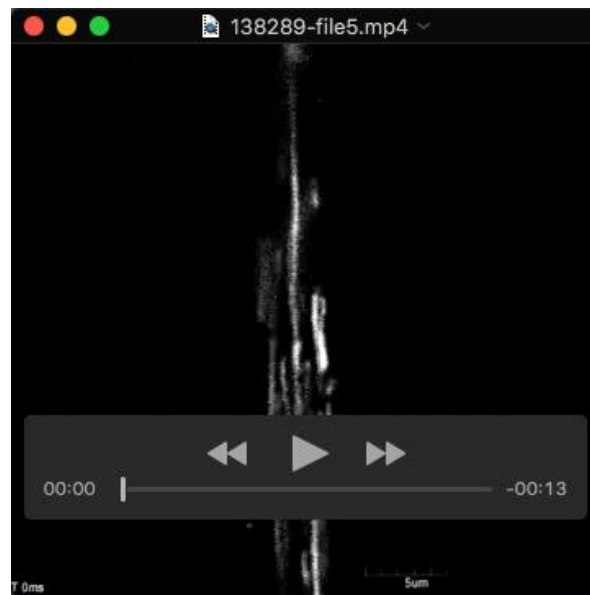

**Supplemental Movie 3. Mitochondria tracking in a developing wild type bristle cell.**

Tracking of the mitochondrial reporter *Neur-Gal4-Mito-GFP* in the middle part of a developing wild type bristle cell, using time-lapse confocal microscopy.

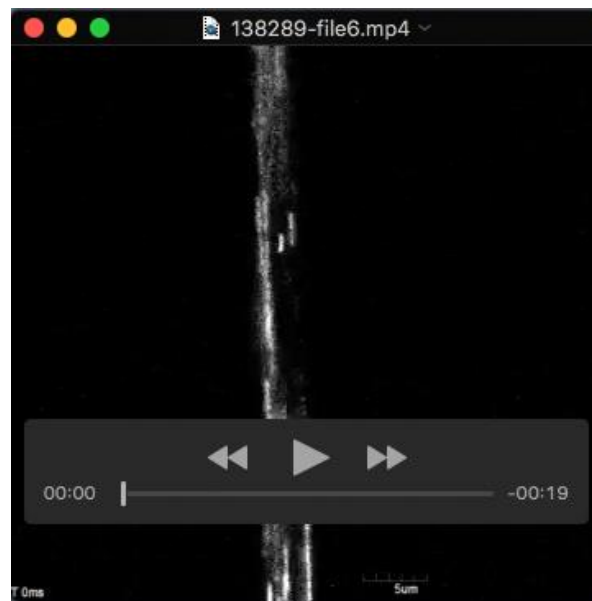

**Supplemental Movie 4. Mitochondria tracking in a developing *Miro-RNAi* bristle cell.**

Tracking of the mitochondrial reporter *Neur-Gal4-Mito-GFP* in the middle part of a developing *neur-Gal4-UAS-Miro-RNAi*<sup>106683</sup> bristle cell, using time-lapse confocal microscopy.

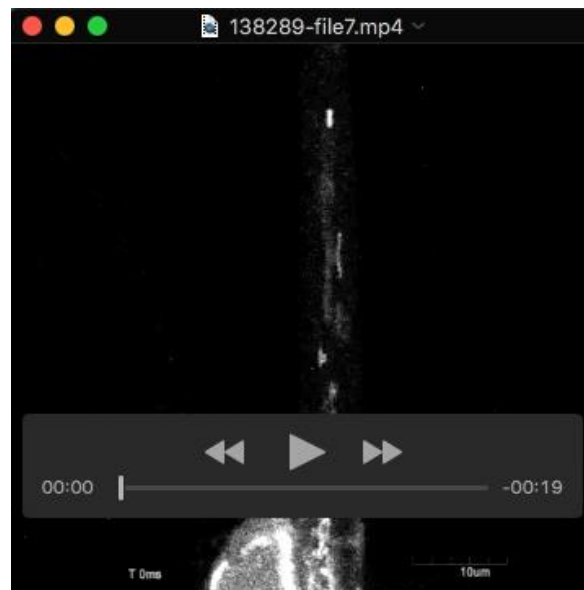

**Supplemental Movie 5. Mitochondria tracking in a developing *Milton-RNAi* bristle cell.**

Tracking of the mitochondrial reporter *Neur-Gal4-Mito-GFP* in the middle part of a developing *neur-Gal4-UAS-Milton-RNAi*<sup>44477</sup> bristle cell, using time-lapse confocal microscopy. An overall decrease in mitochondrial density was seen, although no significant change in net mitochondrial velocity was noted.

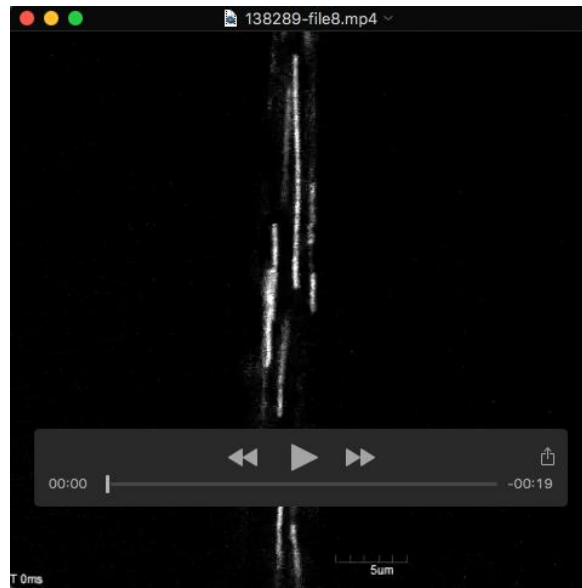

**Supplemental Movie 6. Mitochondria tracking in a developing *Glued-DN* bristle cell.**

Tracking of the mitochondrial reporter *Neur-Gal4-Mito-GFP* in the middle part of a developing *neur-Gal4-UAS-p150-delta96B<sup>51645</sup>* bristle cell, using time-lapse confocal microscopy.



**Supplemental table 1. Mitochondrial movement parameters in *Miro-RNAi<sup>iai</sup>*.**

Mutant parameters found to be significantly different from those of the wild type are marked with an asterisk.

| <b>Table 1. Mitochondrial transport parameters in <i>Drosophila</i> bristles</b> |                                |                    |
|----------------------------------------------------------------------------------|--------------------------------|--------------------|
| Genotype                                                                         | <i>Miro-RNAi<sup>iai</sup></i> |                    |
| Movement directionality                                                          | Anterograde                    | Retrograde         |
| No. of pupae                                                                     | 4                              |                    |
| No. of bristles                                                                  | 12                             |                    |
| No. of moving mitochondria                                                       | 214                            | 34                 |
| Directionality proportion (%)                                                    | <b>86.29±3.71*</b>             | <b>13.70±1.89*</b> |
| Velocity (µm/sec)                                                                | 3.31±0.6                       | 2.46±1.15          |
| Flux                                                                             | 2.70±2.79                      | <b>0.42±0.44*</b>  |
